1 **TITLE:** Content Analysis of YouTube Videos Related to E-cigarettes and COVID-19

2 **SHORT TITLE:** E-cigarettes and COVID-19 on YouTube

3

4 **AUTHORS:** Juhan Lee, PhD<sup>1</sup>, Dhiraj Murthy, PhD<sup>2</sup>, & Grace Kong, PhD<sup>1</sup>

5

6 **AFFILIATIONS:**

7 1 Yale University School of Medicine, New Haven, CT, USA,

8 2 University of Texas at Austin, School of Journalism and Media, Department of Sociology,  
9 Austin, TX, US

10

11 **CORRESPONDING AUTHOR:**

12 Juhan Lee

13 34 Park St, S-206

14 New Haven, CT 06510

15 Office: (203) 974-7356

16 [Juhan.lee@yale.edu](mailto:Juhan.lee@yale.edu)

17

18 **FUNDING:** This study was supported by R01DA049878 (PI: G, Kong).

19 **CONFLICT OF INTEREST:** None

20

21

22 **ABSTRACT**

23 **INTRODUCTION**

24 E-cigarettes are frequently promoted on social media and portrayed in ways that are attractive  
25 to youth. While COVID-19 pandemic significantly affected people's lives, less known is how the  
26 pandemic influenced e-cigarette-related marketing and information on social media. This study  
27 identifies how e-cigarettes are portrayed during the COVID-19 pandemic on YouTube, one of  
28 the most popular social media platforms.

29 **METHODS**

30 We searched for combinations of search terms related to e-cigarettes (i.e., "electronic cigarette",  
31 "e-cigarette", "e-cig", "vape" and "vaping") and COVID-19 (i.e., "corona", "COVID", "lockdown"  
32 and "pandemic"). To be included in the analysis, the video must be: uploaded after February 1,  
33 2020, in English, related to e-cigarettes and COVID-19 and less than 30 minutes in length. We  
34 assessed video themes related to e-cigarettes and COVID-19, uploader characteristics, and  
35 featured e-cigarette products.

36 **RESULTS**

37 We examined N=307 videos and found that N=220 (73.6%) were related to the health effects of  
38 e-cigarette use on COVID-19, followed by videos of how COVID-19 affects e-cigarette  
39 access/sales (N=40, 12.9%), and face mask-related videos (N=16, 5.1%) which included  
40 content regarding masks and e-cigarette use. Instructional videos on how to modify e-cigarettes  
41 to use with masks had the highest number of likes (Median=23; IQR=32) and comments  
42 (Median=10; IQR=7).

43 **CONCLUSIONS**

44 This study identified various e-cigarette contents on YouTube during the COVID-19 pandemic.

45 Our findings support the need for continuous surveillance on novel vaping-related content in

46 reaction to policies and events such as the global pandemic on social media is needed.

47

## 48 1. INTRODUCTION

49 E-cigarette use exposes youth to nicotine and other toxicants, which is associated with  
50 nicotine addiction and progression to other tobacco product use.(1) Nevertheless, e-cigarette  
51 use is frequently portrayed as glamorous on social media, which may appeal to young  
52 people.(2,3) Manufacturers and retailers also use social media to market and sell e-  
53 cigarettes.(4) For example, YouTube, one of the social media platforms most frequently used by  
54 young people (95% among youth who aged 13-17 in 2022),(5) makes youth-appealing content  
55 such as vape tricks highly accessible. Concerningly, 48% of such video content has been  
56 posted by the tobacco industry accounts.(3,6) Given high social media use by youth and rapidly  
57 evolving e-cigarette promotional content on social media, understanding how e-cigarettes are  
58 portrayed on social media is urgently needed.

59 The COVID-19 pandemic affected all aspects of people's lives across the globe and  
60 continues to do so. There is evidence that during the height of the COVID-19 pandemic, social  
61 media was home to misleading content espousing therapeutic and preventive effects of  
62 nicotine on COVID-19.(7) COVID-19 also appeared in the marketing content of e-cigarettes on  
63 social media.(8) For example, Puff Bar posted photos of its factory workers in China wearing  
64 masks and protective gear to demonstrate 'health reassurances' on Instagram.(8) One notable  
65 change in the marketing environment with shop closures during the COVID-19 pandemic as  
66 tobacco stores and vape shops were considered non-essential businesses. As such, some vape  
67 shops posted social media offering 'contactless delivery' and 'curbside pickup'. Some posts  
68 included health assurance themes (e.g., claiming health benefits from e-cigarette use during  
69 COVID-19) and encouraging stockpiling of e-cigarette products during the pandemic.(8) This  
70 shift to online retailers is concerning because they generally have less restrictive age  
71 verification, which can lead to underage e-cigarette use.(9–11)

72           There is a dearth of work examining how COVID-19 is used in e-cigarette marketing on  
73 social media. YouTube is an important source to understand e-cigarette promotion. Given that  
74 YouTube is the most frequently used social media by all age groups,(5) and YouTube is a  
75 popular source to obtain health-related information, including e-cigarettes,(12) examining how  
76 COVID-19 and e-cigarettes are portrayed on YouTube is important. This information may  
77 provide valuable insight into prohibiting the marketing content that promotes e-cigarette use and  
78 identify misinformation to inform countermarketing and educational efforts. Understanding how  
79 e-cigarettes are portrayed in the context of COVID-19 on YouTube is important as this content  
80 may influence perception, attitudes, and even e-cigarette-related behaviors.(13,14)

81           This study developed a data collection and coding framework to identify and evaluate  
82 how COVID-19 and e-cigarettes are portrayed in YouTube videos. Among the videos that  
83 included e-cigarettes and COVID-19, we further identified the video's themes, who posted these  
84 videos, what e-cigarette products were featured, and whether levels of engagement (e.g.,  
85 number of views, comments, likes) differs by these video characteristics.

## 86 **2. METHODS**

### 87 **2.1. Data Collection**

88           We collected videos by combining search terms related to e-cigarettes and COVID-19 in  
89 July 2021 on YouTube. We limited our search to videos uploaded after February 1, 2020, when  
90 COVID-19 was widespread globally. E-cigarette-related terms included “electronic cigarette”, “e-  
91 cigarette”, “e-cig”, “vape” and “vaping” and COVID-related terms included “corona”, “COVID”,  
92 “lockdown” and “pandemic”. We included e-cigarette search words that have been shown to  
93 have the most connections to e-cigarette content on YouTube based on our previous study.(15)  
94 To be included in our dataset, the video had to: (1) be in English, (2) have content related to e-  
95 cigarettes and COVID-19, and (3) be less than 30 minutes in length (to ensure that we are

96 capturing videos that people may watch). We also obtained video metadata (i.e., view counts,  
97 likes, dislikes, and upload date).

## 98 2.2. Codebook Development

99 We adapted a codebook that had previously been used for the analysis of e-cigarette-  
100 related content on YouTube for this study (**Table 1**).<sup>(12)</sup> The lead author viewed the videos  
101 and categorized themes (i.e., classified the major theme as it relates to e-cigarettes and  
102 COVID-19), uploader type (who posted these videos), and featured e-cigarette products  
103 (whether these videos portrayed e-cigarette products) based on prior research<sup>(3,12)</sup> and added  
104 new themes related to COVID-19. Another author reviewed and confirmed and/or modified the  
105 themes. We determined interrater reliability by coding approximately 10% of videos (N=40  
106 videos). Gwet AC1 statistics,<sup>(16)</sup> which addressed the marginal predicted probability issues of  
107 Cohen's kappa statistics,<sup>(17)</sup> ranged from 0.8558 to 1, which indicates "almost perfect"  
108 agreement.<sup>(18)</sup>

## 109 2.3. Data Analysis

110 We conducted descriptive statistical analyses of the number of views, comments, likes,  
111 and upload years for each video theme, uploader type and featured e-cigarette product. Due to  
112 the non-normality of our data, we calculated the median and the inter-quartile range (IQR) for  
113 continuous variables (i.e., view, comment, like) and count and percentage for a categorical  
114 variable (i.e., upload year). To assess whether themes, uploader types and featured e-cigarette  
115 products had different levels of engagement (i.e., number of views, comments, likes) and upload  
116 year, we conducted the Kruskal-Wallis test for continuous variables and Pearson chi-square test  
117 for categorical variables. To assess whether video themes differed by uploader type, we also  
118 conducted chi-square tests.

## 119 3. RESULTS

120 **Figure 1** illustrates our selection of e-cigarette- and COVID-19-related YouTube videos  
121 and exclusion rules. We obtained N=3,796 videos using combinations of e-cigarette-related and  
122 COVID-19-related terms (as described 2.1. *Data Collection*) and included N=307 unique videos  
123 as final analytic sample per our inclusion criteria.

### 124 3.1. Video themes

125 There are five themes related to both e-cigarettes and COVID-19: (1) *health information*  
126 *regarding e-cigarettes and COVID-19* (“*health information*”); these videos portrayed whether  
127 vaping nicotine or other substances (e.g., CBD oils, propolis) increased the health risks related  
128 to COVID-19 or discussed potential therapeutic effects of vaping on COVID-19. (2) *Face mask-*  
129 *related* videos included content that links masks with vaping (“*face masking*”); these videos  
130 portrayed vaping while wearing a mask (e.g., showing and comparing visible vape clouds  
131 through different masks - KN95, N95, cloth masks, and surgical masks. (3) *Instructional – how*  
132 *to modify/use e-cigarettes* (“*instructional*”) videos; these videos portrayed how to content,  
133 including sanitizing vape devices during COVID-19 and demonstrated how to modify a vaping  
134 device to use with face masks. (4) *how COVID-19 affects e-cigarette access/sales*  
135 (“*access/sales*”) videos discussed how the COVID-19 pandemic changed the marketing and  
136 sale of e-cigarettes. This included the vape shop closing and offering delivery of vape products.  
137 (5) “*Other*” themes included videos that did not fit into these themes. These included videos of  
138 vape parties abroad during the travel ban.

### 139 3.2. Uploader type

140 To determine the uploader type, we examined the Channel Pages (i.e., “profile” page of the  
141 video uploader) of each YouTube video. There are six uploader types: (1) *Retailers* are any  
142 Channel that is run by/for vape and other tobacco brick and mortar stores or online stores where  
143 they sell e-cigarettes. (2) *Vape enthusiasts* are independent users who post almost exclusively

144 about vaping – over 50% of their videos are related to vaping but are not directly connected to  
145 the vape industry. (3) *Medical communities* are any individual/organization with  
146 medical/healthcare credentials or who/that conducts research related to vaping and smoking.  
147 (4) *News Channels* are media outlets that focus on delivering news, such as traditional  
148 broadcasting as well as new media channels. (5) *Private users* are YouTube creators (a single  
149 person or a group) who post about a variety of topics, which can include vaping. (6) *Other*  
150 include other Channels that do not fall into these categories such as a Channel focused on  
151 fitness.

### 152 3.3. Featured e-cigarette products

153 We determined first whether an e-cigarette product was present, and if present, we attempted to  
154 identify the depicted product. (1) “*Featured*”: when the video explicitly introduced or presented  
155 an e-cigarette product including any types of e-cigarette device including cigalike, e-liquid (e-  
156 juice), vaping kit, box mod, vape pen, closed pod system, disposable, or vape box of  
157 subscription service. (2) “*Not featured*”: when videos did not feature a specific e-cigarette  
158 product.

159 **Table 2** provides details of our results, including the number of views, comments, likes,  
160 and published year for each of the video themes, uploader types, and featured e-cigarette  
161 products. Among N=307 videos, 73.6% were “*health information*” videos (e.g., how e-cigarette  
162 use affects COVID-19 diagnosis and prognosis), followed by “*access/sales*” and “*face mask-*  
163 *related*” videos (e.g., experiment of vaping with different types of masks; 5.1%). 36.5% were  
164 posted by *private users*, followed by *news channels* (36.2%), *medical communities* (16.9%), and  
165 *retailers* (6.8%). Of note, the majority (89.3%) of the videos did not feature a specific e-cigarette  
166 product.



167           There were significant differences between the video theme and the number of  
168    comments and likes. “*Instructional*” videos had the highest like count (Median=23; IQR=32),  
169    followed by “*access/sales*” videos (Median=22; IQR=76). Similarly, “*instructional*” videos had the  
170    highest number of comments (Median=10; IQR=7), followed by “*access/sales*” videos  
171    (Median=7; IQR=36). There was also a significant difference in view count by uploader type.  
172    Videos uploaded by *retailers* had the highest view count (Median=520; IQR=1519), followed by  
173    *medical communities* (Median=457; IQR=7229.5), and *news channels* (Median=319;  
174    IQR=2003). There was no significant difference in view counts, comments, likes, and upload  
175    year by featured e-cigarette product (all  $ps>0.05$ ).

176           **Table 3** presented results related to video themes and uploader type. Importantly, we  
177    found that there was a significant association between theme and uploader type. Specifically,  
178    the majority of “*health information*” videos were uploaded by *medical communities* and *news*  
179    *channels*, 98.1% and 90.1%, respectively. The proportions of videos that were uploaded by  
180    *private users* were “*health information*” (59.8%), followed will by “*access/sales*” (16.1%) and  
181    “*face mask related*” (13.4%). The association between video themes posted by *retailers* and  
182    *vape enthusiasts* differed. For example, the most common videos that were uploaded by  
183    *retailers* were “*access/sales*” (47.6%) and “*instructional*” (19.1%); while “*health information*”  
184    (44.4%) and “*access/sales*” (22.2%) were most common videos that uploaded by *vape*  
185    *enthusiasts*.

#### 186    **4. DISCUSSION**

187           To the best of our knowledge, this study is the first to examine YouTube videos that are  
188    related to both e-cigarettes and COVID-19. Moreover, our data represents the height of the  
189    pandemic, between February 2020 and July 2021. In our collected data, the most common  
190    theme was “*health information*”, which presented conflicting health information on whether

191 vaping exacerbated the risk of or was protective from COVID-19 infection. The second most  
192 common theme was related to “*access/sales*”, which included the closure of vape shops and the  
193 shift to online stores due to the pandemic. We also observed that videos uploaded by retail  
194 stores showed the highest view counts, and “*instructional*” and “*access/sales*” videos showed  
195 the highest comments and likes, respectively.

196         The “*health information*” videos reflected media coverage of research studies published  
197 at the time, which conflicted over findings regarding the role of e-cigarette use on COVID-19.  
198 Some studies indicated a greater risk of COVID-19 infection and worse prognosis(19–22) since  
199 exposure to nicotine and other chemicals through e-cigarette use may affect the respiratory  
200 system.(23–28) In contrast, other studies indicated that nicotine and e-cigarette use may not be  
201 associated with COVID-19; rather, nicotine may even be a protective factor.(29–33) Only a few  
202 videos, typically uploaded by e-cigarette brand and retailers, either suggested that vaping is  
203 protective against COVID-19 or claimed no association. For example, one video uploaded by an  
204 online e-cigarette retailer claimed that “*NIDA did not provide scientific evidence when NIDA had*  
205 *advised quit vaping during pandemic.*” Of note, this video mimicked a news channel, including  
206 hosts wearing suits and text scrolling at the bottom of the screen, which may have misled  
207 viewers. This online retailer uploaded a follow-up video that claimed that FDA found no  
208 connection between vaping and getting COVID-19. This video did not provide valid sources and  
209 provided only a link to a pro-vaping organization blog with broken news links. A few videos  
210 recommended vaping other substances (e.g., CBD, propolis) to protect themselves from  
211 COVID-19 and to treat COVID-19. Some potential therapeutic effects of CBD on pain, nausea,  
212 and epilepsy are confirmed by NIDA,(34) but there is no evidence to support that CBD protects  
213 users against COVID-19. Another video suggested that vaping “bee juice” (propolis) can prevent  
214 COVID-19. Propolis may be a healthy substance for strengthening immune systems(35);  
215 however, there is no evidence to support that use of these substances or vaping these

216 substances can protect individuals from getting or treating COVID-19. Given that the effect of  
217 vaping such substances on COVID-19 is still unclear,(36–40) these videos are disseminating  
218 unconfirmed health information.

219 Notably, a number of “*face mask-related*” videos existed. For example, videos showed  
220 comparisons of vaping with different types of cloth, surgical, and N95 masks and vaping while  
221 wearing a mask. Some aerosols were retained in masks, which may cause re-inhalation. This is  
222 concerning since re-inhalation may increase exposure to nicotine and chemicals from  
223 vaping.(41) Further, we found a video instructing how to modify a vaping device for use while  
224 wearing a mask. Consistent with prior studies,(12,42) e-cigarette modification videos still  
225 persist, but are now related to COVID-19. Taken together, these results show that videos  
226 endorsing risky behaviors and have gained attention from YouTube users. Surveillance is  
227 warranted to continuously identify videos that might mislead or endanger viewers.

228 We observed more likes and comments for “*instructional*” and “*sales/access*” videos  
229 than for videos with other themes. Even though the comments were not systematically  
230 analyzed, it appeared that the comments were positive towards vape retailers and negative  
231 towards governmental decisions regarding vape shop closure during COVID-19. For example,  
232 the positive comments showed appreciation of entrepreneurship (e.g., “*amazing to see a*  
233 *business going so far for their customers, respect!*”). The negative comments were geared  
234 toward governmental decisions regarding vape shop closure during COVID-19 since vape  
235 shops were considered “non-essential” businesses (e.g., “*all businesses are essential.*  
236 *Regardless, telling a business they can't open is unconstitutional. Polis [sic.] should be sued*  
237 *and arrested for illegally imposing orders that violate citizens constitutional rights*”).

238 Video themes in the “*other*” category included an upscale party (e.g., women wearing  
239 formal gowns and jewelry, candlelight in the patio party room) in Bali Indonesia where party

240 attendees were vaping. A video in the “*other*” category of a party abroad that took place  
241 during the travel ban was uploaded by a vape shop. Such videos are concerning because of the  
242 portrayal of vaping as cool and glamorous, especially during the travel ban during COVID-19.

243 In summary, we identified a variety of e-cigarette-related content during the COVID-19  
244 pandemic, which includes health information related to e-cigarettes and COVID-19, e-cigarette  
245 sales and access during COVID-19 (e.g., vape shop closure), and face-mask-related e-cigarette  
246 videos. Nonetheless, we acknowledge several limitations. First, we analyzed only videos in  
247 English and there may be other content related to COVID-19 not captured in English. Since  
248 YouTube is a social media platform used globally and e-cigarette use and COVID-19 are global  
249 health issues, future studies would benefit from examining non-English content. Second, we  
250 examined e-cigarettes and COVID-19-related content only on YouTube. Future studies should  
251 examine other social media platforms as the content may differ. Third, future studies should  
252 systematically analyze the sentiments of the comments to better understand perceptions related  
253 to misinformation related to e-cigarettes and COVID-19 to communicate accurate health  
254 information on social media.

255 Currently, COVID-19 is still widespread globally. As the health impacts regarding e-  
256 cigarette use on COVID-19 are less known, future studies should examine the association  
257 between them. Future studies should also examine how health information regarding e-  
258 cigarettes and COVID-19 is portrayed on social media such as YouTube, and how COVID-19  
259 was used for e-cigarette promotion. Continuous surveillance and the monitoring of novel vaping-  
260 related content in reaction to policies and events such as the global pandemic on social media  
261 are urgently needed.

262

263 **REFERENCE**

- 264 1. U.S. Department of Health and Human Services. E-cigarette use among youth and young  
265 adults: A report of the Surgeon General. Atlanta, GA; 2016.
- 266 2. Dormanesh A, Kirkpatrick MG, Allem JP. Content analysis of Instagram posts from 2019  
267 with cartoon-based marketing of e-cigarette–associated products. *JAMA Pediatr.* 2020;
- 268 3. Kong G, LaVallee H, Rams A, Ramamurthi D, Krishnan-Sarin S. Promotion of vape tricks  
269 on YouTube: Content analysis. *J Med Internet Res.* 2019;21:e12709.
- 270 4. O'Brien EK, Hoffman L, Navarro MA, Ganz O. Social media use by leading US e-  
271 cigarette, cigarette, smokeless tobacco, cigar and hookah brands. *Tob Control.* 2020;
- 272 5. Pew Research Center. Teens, Social Media and Technology 2022. 2022; Available from:  
273 [https://www.pewresearch.org/internet/2022/08/10/teens-social-media-and-technology-](https://www.pewresearch.org/internet/2022/08/10/teens-social-media-and-technology-2022/)  
274 [2022/](https://www.pewresearch.org/internet/2022/08/10/teens-social-media-and-technology-2022/)
- 275 6. Kong G, Morean ME, Bold KW, Wu R, Bhatti H, Simon P, et al. Dripping and vape tricks:  
276 Alternative e-cigarette use behaviors among adolescents. *Addict Behav.* 2020;107.
- 277 7. Kamiński M, Muth A, Bogdański P. Smoking, Vaping, and Tobacco Industry during  
278 COVID-19 Pandemic: Twitter Data Analysis. *Cyberpsychology, Behav Soc Netw.*  
279 2020;23(12).
- 280 8. Ramamurthi D, Chau C, Jackler RK. Exploitation of the COVID-19 pandemic by e-  
281 cigarette marketers. *Tob Control.* 2021;30(e1).
- 282 9. Schiff SJ, Kechter A, Simpson KA, Ceasar RC, Braymiller JL, Barrington-Trimis JL.  
283 Accessing Vaping Products When Underage: A Qualitative Study of Young Adults in  
284 Southern California. *Nicotine Tob Res.* 2021;23(5).
- 285 10. Gaiha SM, Lempert LK, Halpern-Felsher B. Underage youth and young adult e-cigarette  
286 use and access before and during the coronavirus disease 2019 pandemic. *JAMA Netw*  
287 *Open.* 2020;3(12).
- 288 11. Stokes AC. Declines in electronic cigarette use among US youth in the era of Covid-19-A  
289 critical opportunity to stop youth vaping in its tracks. Vol. 3, *JAMA Network Open.* 2020.
- 290 12. Kong G, Schott A, Lee J, Dashtian H, Murthy D. Understanding e-cigarette content and  
291 promotion on YouTube through machine learning. *Tob Control.* 2022;In Press.
- 292 13. Vogel EA, Ramo DE, Rubinstein ML, Delucchi KL, Darrow S, Costello C, et al. Effects of  
293 social media on adolescents' willingness and intention to use e-cigarettes: An  
294 experimental investigation. *Nicotine Tob Res.* 2020;ntaa003.
- 295 14. Donaldson SI, Dormanesh A, Perez C, Majmundar A, Allem J-P. Association between  
296 exposure to tobacco content on social media and tobacco use: A systematic review and  
297 meta-analysis. *JAMA Pediatr.* 2022;176(9):878–85.
- 298 15. Dashtian H, Murthy D, Kong G. An exploration of e-cigarette–related search items on  
299 YouTube: Network analysis. *J Med Internet Res.* 2022;24(1):e30679.
- 300 16. Wongpakaran N, Wongpakaran T, Wedding D, Gwet KL. A comparison of Cohen's  
301 Kappa and Gwet's AC1 when calculating inter-rater reliability coefficients: A study  
302 conducted with personality disorder samples. *BMC Med Res Methodol.* 2013;13(1).

- 303 17. Zec S, Soriani N, Comoretto R, Baldi I. High Agreement and High Prevalence: The  
304 Paradox of Cohen's Kappa. *Open Nurs J.* 2017;11(1).
- 305 18. Gwet KL, Li Gwet K, Gwet KL. *Handbook of Inter-Rater Reliability: the definitive guide to*  
306 *measuring the extent of agreement among raters.* Gaithersburg, MD: STATAXIS  
307 Publishing Company. 2010.
- 308 19. Gaiha SM, Cheng J, Halpern-Felsher B. Association Between Youth Smoking, Electronic  
309 Cigarette Use, and COVID-19. *J Adolesc Heal.* 2020;67(4).
- 310 20. Brake SJ, Barnsley K, Lu W, McAlinden KD, Eapen MS, Sohal SS. Smoking upregulates  
311 angiotensin-converting Enzyme-2 receptor: A potential adhesion site for novel  
312 coronavirus SARS-CoV-2 (COVID-19). Vol. 9, *Journal of Clinical Medicine.* 2020.
- 313 21. Sivaraman V, Parker D, Zhang R, Jones MM, Onyenwoke RU. Vaping Exacerbates  
314 Coronavirus-Related Pulmonary Infection in a Murine Model. *Front Physiol.* 2021;12.
- 315 22. McFadden DD, Bornstein SL, Vassallo R, Salonen BR, Nadir Bhuiyan M, Schroeder DR,  
316 et al. Symptoms COVID 19 Positive Vapers Compared to COVID 19 Positive Non-vapers.  
317 *J Prim Care Community Health.* 2022;13.
- 318 23. Ghosh A, Coakley RD, Ghio AJ, Muhlebach MS, Esther CR, Alexis NE, et al. Chronic E-  
319 cigarette use increases neutrophil elastase and matrix metalloprotease levels in the lung.  
320 *Am J Respir Crit Care Med.* 2019;200(11).
- 321 24. McConnell R, Barrington-Trimis JL, Wang K, Urman R, Hong H, Unger J, et al. Electronic  
322 cigarette use and respiratory symptoms in adolescents. *Am J Respir Crit Care Med.*  
323 2017;195(8).
- 324 25. Wills TA, Pagano I, Williams RJ, Tam EK. E-cigarette use and respiratory disorder in an  
325 adult sample. *Drug Alcohol Depend.* 2019;194.
- 326 26. Hamberger ES, Halpern-Felsher B. Vaping in adolescents: epidemiology and respiratory  
327 harm. Vol. 32, *Current opinion in pediatrics.* 2020.
- 328 27. Reidel B, Radicioni G, Clapp PW, Ford AA, Abdelwahab S, Rebuli ME, et al. E-cigarette  
329 use causes a unique innate immune response in the lung, involving increased  
330 neutrophilic activation and altered mucin secretion. *Am J Respir Crit Care Med.*  
331 2018;197(4).
- 332 28. Reinikovaite V, Rodriguez IE, Karoor V, Rau A, Trinh BB, Deleyiannis FWB, et al. The  
333 effects of electronic cigarette vapour on the lung: Direct comparison to tobacco smoke.  
334 Vol. 51, *European Respiratory Journal.* 2018.
- 335 29. Garufi G, Carbognin L, Orlandi A, Tortora G, Bria E. Smoking habit and hospitalization for  
336 severe acute respiratory syndrome coronavirus 2 (SARS-CoV-2)-related pneumonia: The  
337 unsolved paradox behind the evidence. Vol. 77, *European Journal of Internal Medicine.*  
338 2020.
- 339 30. Volti GL, Caruso M, Polosa R. Smoking and sars-cov-2 disease (Covid-19): Dangerous  
340 liaisons or confusing relationships? *J Clin Med.* 2020;9(5).
- 341 31. Lippi G, Henry BM. Active smoking is not associated with severity of coronavirus disease  
342 2019 (COVID-19). Vol. 75, *European Journal of Internal Medicine.* 2020.
- 343 32. Changeux JP, Amoura Z, Rey FA, Miyara M. A nicotinic hypothesis for Covid-19 with



- 344 preventive and therapeutic implications. Vol. 343, Comptes Rendus - Biologies. 2020.
- 345 33. Jose T, Croghan IT, Hays JT, Schroeder DR, Warner DO. Electronic Cigarette Use Is Not  
346 Associated with COVID-19 Diagnosis. *J Prim Care Community Heal.* 2021;12.
- 347 34. National Institute of Drug Abuse. "Cannabidiol: Barriers to Research and Potential  
348 Medical Benefits" [Internet]. 2015. Available from:  
349 [https://archives.drugabuse.gov/testimonies/2015/biology-potential-therapeutic-effects-](https://archives.drugabuse.gov/testimonies/2015/biology-potential-therapeutic-effects-cannabidiol#:~:text=CBD has shown therapeutic efficacy,measures of stress and anxiety.&text=In addition%2C CBD has shown,human laboratory and clinical trials.)  
350 [cannabidiol#:~:text=CBD has shown therapeutic efficacy,measures of stress and](https://archives.drugabuse.gov/testimonies/2015/biology-potential-therapeutic-effects-cannabidiol#:~:text=CBD has shown therapeutic efficacy,measures of stress and anxiety.&text=In addition%2C CBD has shown,human laboratory and clinical trials.)  
351 [anxiety.&text=In addition%2C CBD has shown,human laboratory and clinical trials.](https://archives.drugabuse.gov/testimonies/2015/biology-potential-therapeutic-effects-cannabidiol#:~:text=CBD has shown therapeutic efficacy,measures of stress and anxiety.&text=In addition%2C CBD has shown,human laboratory and clinical trials.)
- 352 35. Pasupuleti VR, Sammugam L, Ramesh N, Gan SH. Honey, Propolis, and Royal Jelly: A  
353 Comprehensive Review of Their Biological Actions and Health Benefits. Vol. 2017,  
354 *Oxidative Medicine and Cellular Longevity.* 2017.
- 355 36. Camoretti-Mercado B, Liao Q, Tian Z, Allen-Gipson D. Editorial: Cigarette Smoke, E-  
356 Cigarette/E-Vaping and COVID-19: Risks and Implications in This New Era. Vol. 12,  
357 *Frontiers in Physiology.* 2021.
- 358 37. Farsalinos K, Barbouni A, Poulas K, Polosa R, Caponnetto P, Niaura R. Current smoking,  
359 former smoking, and adverse outcome among hospitalized COVID-19 patients: a  
360 systematic review and meta-analysis. Vol. 11, *Therapeutic Advances in Chronic Disease.*  
361 2020.
- 362 38. Kelesidis T, Zhang Y, Tran E, Sosa G, Middlekauff HR. Instigators of COVID-19 in  
363 Immune Cells Are Increased in Tobacco Cigarette Smokers and Electronic Cigarette  
364 Vapers Compared With Nonsmokers. *Nicotine Tob Res.* 2021;
- 365 39. Sharma P, Zeki AA. Does Vaping Increase Susceptibility to COVID-19? *Am J Respir Crit*  
366 *Care Med.* 2020;202(7).
- 367 40. Zhang H, Rostamim MR, Leopold PL, Mezey JG, O'Beirne SL, Strulovici-Barel Y, et al.  
368 Reply to Sharma and Zeki: Does Vaping Increase Susceptibility to COVID-19? *Am J*  
369 *Respir Crit Care Med.* 2020;202(7).
- 370 41. Traboulsi H, Cherian M, Rjeili MA, Preteroti M, Bourbeau J, Smith BM, et al. Inhalation  
371 toxicology of vaping products and implications for pulmonary health. Vol. 21, *International*  
372 *Journal of Molecular Sciences.* 2020.
- 373 42. Guy MC, Helt J, Palafox S, Green K, Soule EK, Maloney SF, et al. Orthodox and  
374 Unorthodox Uses of Electronic Cigarettes: A Surveillance of YouTube Video Content.  
375 *Nicotine Tob Res.* 2019;21(10).
- 376

**Table 1.** Definitions and examples of categories

| <b>THEME</b>                                                                                                  | <b>DEFINITION AND EXAMPLES</b>                                                                                                                                                                                                                                                                                                                                                                                                                   |
|---------------------------------------------------------------------------------------------------------------|--------------------------------------------------------------------------------------------------------------------------------------------------------------------------------------------------------------------------------------------------------------------------------------------------------------------------------------------------------------------------------------------------------------------------------------------------|
| <i>Health information-how e-cigarette use affects COVID-19 diagnosis and prognosis (“health information”)</i> | Content featuring health risks and protection for COVID-19 through vaping nicotine or other substances<br><b>Examples</b> <ul style="list-style-type: none"> <li>• Vaping nicotine increases the risk and worsens symptoms/prognosis of COVID-19</li> <li>• Nicotine in tobacco product use may block the COVID-19 virus and protect from getting COVID-19</li> <li>• Vaping CBD oils or propolis may be protective against COVID-19.</li> </ul> |
| <i>Face mask related</i>                                                                                      | Content linking face mask with vaping such as showing exhaled aerosol from vaping while wearing a mask.<br><b>Examples</b> <ul style="list-style-type: none"> <li>• Experiment of vaping with different types of masks – face shield, N95, K95, cloth mask, surgical mask and compare how clouds come out</li> </ul>                                                                                                                             |
| <i>Instructional – how to modify/use e-cigarettes (“instructional”)</i>                                       | Content on how to modify a vaping device to use with masks on (e.g. so that people can vape while wearing a mask on) and how to sanitize the vape devices during COVID-19 using Purell and Isopropyl Alcohol)                                                                                                                                                                                                                                    |
| <i>How COVID-19 affects e-cigarette access/sales (“access/sales”)</i>                                         | Content on how COVID-19 changed the marketing and sale of e-cigarettes<br><b>Examples</b> <ul style="list-style-type: none"> <li>• Vape shop closed during COVID-19 pandemic as those are considered “non-essential” businesses</li> <li>• Vape shops offering delivery of e-cigarettes during COVID-19</li> </ul>                                                                                                                               |
| <i>Other</i>                                                                                                  | Content about vaping and COVID, but they do not fall into any of the other categories.<br><b>Example:</b> <ul style="list-style-type: none"> <li>• Showing vape party in exotic resort place (e.g., Bali) during the travel ban</li> </ul>                                                                                                                                                                                                       |
| <b>UPLOADER</b>                                                                                               |                                                                                                                                                                                                                                                                                                                                                                                                                                                  |
| <i>Retailers</i>                                                                                              | Any Channel which is run by/for a vape shop with a brick and mortar store or an online store that sells e-cigarette products                                                                                                                                                                                                                                                                                                                     |
| <i>Vape enthusiasts</i>                                                                                       | Independent Channel who posts almost exclusively about vaping – over 50% of videos are related to vaping but are not directly connected to a vape industry.                                                                                                                                                                                                                                                                                      |
| <i>Medical communities</i>                                                                                    | Individual/organization with credentials in medicine or conducts research related to vaping and smoking (e.g., Cleveland Clinic, UW Health, Mayo Clinic, WHO).<br>People who are clearly pretending or acting as if they had those qualifications were not included.                                                                                                                                                                             |
| <i>News channels</i>                                                                                          | Channel that focuses on delivering news, such as mainstream broadcasting Channels (e.g., ABC, CNN, CBS)                                                                                                                                                                                                                                                                                                                                          |
| <i>Private users</i>                                                                                          | YouTube creator (a single person or a group) who posts about a variety of topics, which can include vaping, as long as vaping is not the focus of the Channel.                                                                                                                                                                                                                                                                                   |
| <i>Others</i>                                                                                                 | Any Channel which does not fall into one of the other categories (e.g, Fitness information Channel)                                                                                                                                                                                                                                                                                                                                              |
| <b>E-CIGARETTE PRODUCT FEATURED</b>                                                                           |                                                                                                                                                                                                                                                                                                                                                                                                                                                  |
| <i>Featured</i>                                                                                               | Videos that feature specific e-cigarette products such as cigalike, e-liquids (e-juice), vaping kit, box mod, vape pen, closed pod system, disposable, vape box or subscription service                                                                                                                                                                                                                                                          |
| <i>Not Featured</i>                                                                                           | Videos which do not present any specific e-cigarette devices.                                                                                                                                                                                                                                                                                                                                                                                    |



**Figure 1. Inclusion of YouTube videos on vaping and COVID-19 and reasons for exclusion.**

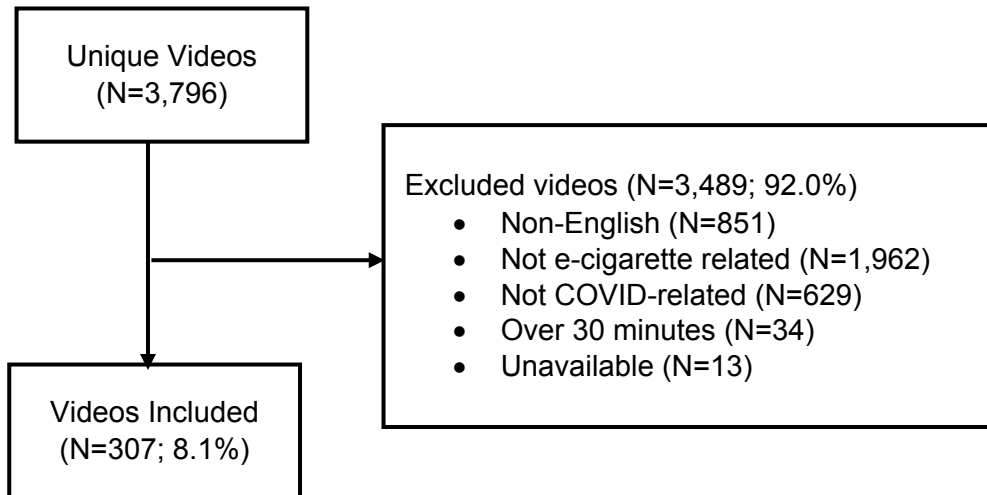

**Table 2.** Descriptive Characteristics of Videos Related to E-cigarettes and COVID-19 (N=307)

|                                                                                                                 | Overall    | 1. View <sup>a</sup>         | 2. Comment <sup>a</sup>      | 3. Like <sup>a</sup>         | 4. year <sup>b</sup> |           |
|-----------------------------------------------------------------------------------------------------------------|------------|------------------------------|------------------------------|------------------------------|----------------------|-----------|
|                                                                                                                 |            |                              |                              |                              | 2020                 | 2021      |
|                                                                                                                 | N (%)      | Median (IQR)                 | Median (IQR)                 | Median (IQR)                 | N (%)                |           |
| <b>Theme <sup>e</sup></b>                                                                                       |            | <i>p</i> =0.179 <sup>c</sup> | <i>p</i> =0.044 <sup>c</sup> | <i>p</i> =0.009 <sup>c</sup> | <i>p</i> =0.099      |           |
| Health information-how e-cigarette use affects COVID-19 diagnosis and prognosis (“ <i>health information</i> ”) | 229 (73.6) | 219 (1625)                   | 2 (8)                        | 3 (19)                       | 208 (76.7)           | 21 (58.3) |
| Face mask related                                                                                               | 16 (5.1)   | 41.5 (835.5)                 | 0 (1)                        | 2.5 (8)                      | 13 (4.8)             | 3 (8.3)   |
| Instructional – how to modify/use e-cigarettes (“ <i>instructional</i> ”)                                       | 10 (3.2)   | 392 (1646)                   | 10 (7)                       | 23 (32)                      | 6 (2.2)              | 3 (8.3)   |
| How COVID-19 affects e-cigarette access/sales (“ <i>access/sales</i> ”)                                         | 40 (12.9)  | 680 (3698)                   | 7 (36)                       | 22 (76)                      | 32 (11.8)            | 7 (19.4)  |
| Other                                                                                                           | 16 (5.1)   | 146.5 (2670)                 | 2.5 (6)                      | 4 (54)                       | 12 (4.4)             | 2 (5.6)   |
| <b>Uploader</b>                                                                                                 |            | <i>p</i> =0.001 <sup>c</sup> | <i>p</i> =0.054 <sup>c</sup> | <i>p</i> =0.609 <sup>c</sup> | <i>p</i> =0.420      |           |
| Retailers                                                                                                       | 21 (6.8)   | 520 (1519)                   | 1 (7)                        | 12 (29)                      | 19 (7.0)             | 2 (5.6)   |
| Vape enthusiasts                                                                                                | 9 (2.9)    | 48 (336)                     | 1 (6)                        | 3 (24)                       | 8 (3.0)              | 1 (2.8)   |
| Medical communities                                                                                             | 52 (16.9)  | 457 (7229.5)                 | 1.5 (13.5)                   | 5.5 (47)                     | 47 (17.3)            | 5 (13.9)  |
| News Channels                                                                                                   | 111 (36.2) | 319 (2003)                   | 3 (15)                       | 3 (20)                       | 102 (37.6)           | 9 (25.0)  |
| Private users                                                                                                   | 112 (36.5) | 101 (737)                    | 1 (9.5)                      | 3 (27)                       | 93 (34.3)            | 19 (52.8) |
| Others                                                                                                          | 2 (0.7)    | 213 (382)                    | 0 (0)                        | 2 (4)                        | 2 (0.7)              | 0 (0)     |
| <b>E-cigarette product featured</b>                                                                             |            | <i>p</i> =0.697 <sup>c</sup> | <i>p</i> =0.718 <sup>c</sup> | <i>p</i> =0.547 <sup>c</sup> | <i>p</i> =0.365      |           |
| Featured                                                                                                        | 33 (10.7)  | 197 (1643)                   | 1 (11)                       | 3 (21)                       | 28 (10.3)            | 2 (5.6)   |
| Not Featured                                                                                                    | 277 (89.3) | 230 (2013)                   | 2 (10)                       | 4 (28)                       | 243 (89.7)           | 34 (94.4) |

a: Median (IQR) for continuous variables due to non-normality; b: N(%) indicated for categorical variables; c: Kruskal-Wallis test for continuous variables due to non-normality; d: Pearson chi-square tests for categorical variables; e: Themes are coded multiple times if the video presented different themes

**TABLE 3.** Proportions across themes and uploader types

|                                                                                                                 | Uploader  |                  |                     |               |               |         | P-value          |
|-----------------------------------------------------------------------------------------------------------------|-----------|------------------|---------------------|---------------|---------------|---------|------------------|
|                                                                                                                 | Retailers | Vape enthusiasts | Medical communities | News Channels | Private users | Others  |                  |
|                                                                                                                 | N (%)     | N (%)            | N (%)               | N (%)         | N (%)         | N (%)   |                  |
| <b>Theme</b>                                                                                                    |           |                  |                     |               |               |         | <b>&lt;0.001</b> |
| Health information-how e-cigarette use affects COVID-19 diagnosis and prognosis ( <i>“health information”</i> ) | 5 (23.8)  | 4 (44.4)         | 51 (98.1)           | 100 (90.1)    | 67 (59.8)     | 2 (100) |                  |
| Face mask related                                                                                               | 0 (0)     | 1 (11.1)         | 0 (0)               | 0 (0)         | 15 (13.4)     | 0 (0)   |                  |
| Instructional – how to modify/use e-cigarettes ( <i>“instructional”</i> )                                       | 4 (19.1)  | 0 (0)            | 0 (0)               | 0 (0)         | 5 (4.5)       | 0 (0)   |                  |
| How COVID-19 affects e-cigarette access/sales ( <i>“access/sales”</i> )                                         | 10 (47.6) | 2 (22.2)         | 0 (0)               | 9 (8.1)       | 18 (16.1)     | 0 (0)   |                  |
| Other                                                                                                           | 2 (9.5)   | 2 (22.2)         | 1 (1.9)             | 2 (1.8)       | 7 (6.3)       | 0 (0)   |                  |
